# Supplementary material for: Hedgehog signaling pathway regulates ovarian cancer invasion and migration via adhesion molecule CD24
Source: PubMed Central journal article supplement — J Cancer. 2017 Feb 25;8(5):786–92. doi: 10.7150/jca.17712 (PMC5381166; doi:10.7150/jca.17712), 2017-02-25
Supplement: jcav08p0786s1.pdf [file jcav08p0786s1.pdf]

Table S1 siRNA sequence for CD24 genes

| Name | Sequence (5' to 3')                                                    |
|------|------------------------------------------------------------------------|
| 1#F  | TGCTG TTCAGT TCCCAAGAGAACAGCGTTTTGGCCACTGA<br>CTGACGCTGTTCTTGGGAACTGAA |
| 1#R  | CAAGTCAAGGGTTCTCTTGTCGAAAACCGGTGACTGACT<br>GCGAC A AG AACCTTGACTTGTC   |
| 2#F  | TGCTGATCAAGAGTTGCTCAGGATGCGTTTTGGCCACTGAC<br>TGACG CA TCCTGCAACTCTTGAT |
| 2#R  | CTAGTTCTCAACGAGTCCTACGAAAACCGGTGACTGACT<br>GCGTAG GACGTTGAGA ACTAGTCC  |
| 3#F  | TGCTGATTAGTCGTGGTCAATGCAATGTTTTGGCCACTGAC<br>TGACA TTGCATTCCACGACTAAT  |
| 3#R  | CTAATCAGCACCAGTTACGTTACAAAACCGGTGACTGACTG<br>TAAC GTAAGGTGCTGATTAGTCC  |

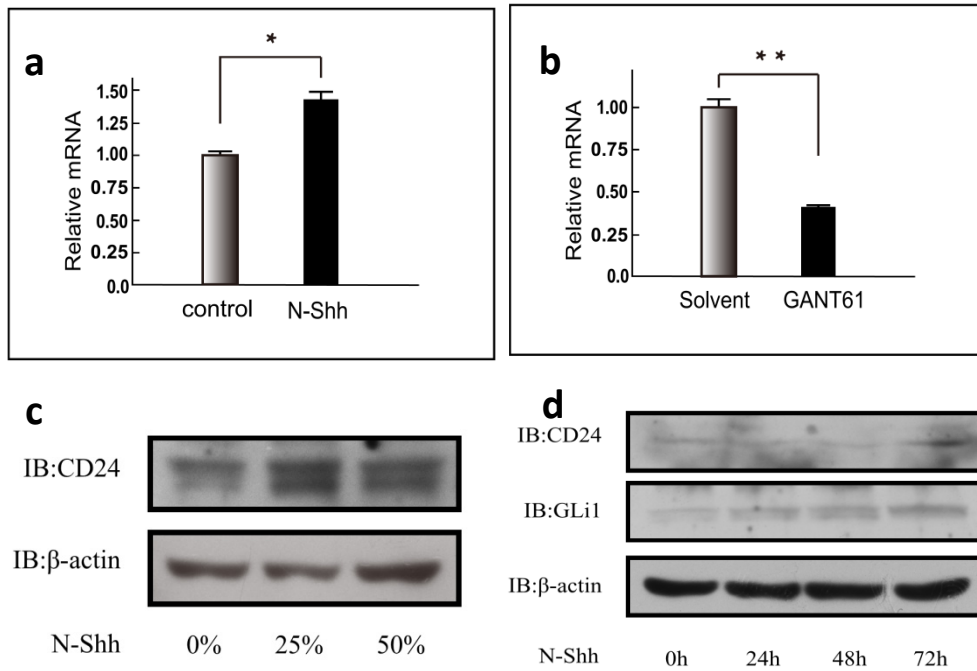

Fig S1 Gene and protein expression profiles of CD24 in SHH- treated and GANT61- treated SKOV3 cells. SKOV3 cells were incubated in the presence of N-Shh 50% and GANT61 (20 mM), the gene expression profiling and protein expression profiling were analyzed by real-time PCR and Western blots. \*,  $P < 0.05$ ; \*\*,  $P < 0.01$ .

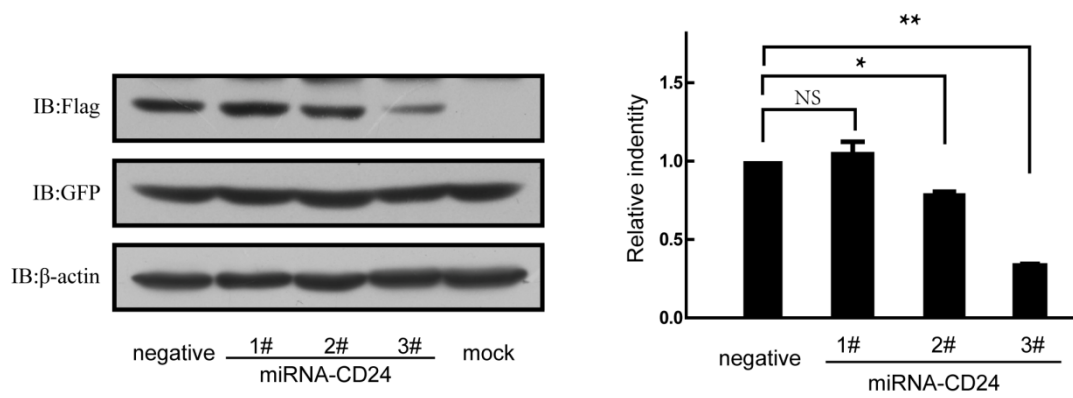

Fig S2 Evaluation of the best CD24 siRNA fragment using Western blots. \*, P<0.05; \*\*, P<0.01.
